# Supplementary material
Source: MDPI journal article supplement (https://www.mdpi.com/2072-6694/12/2/296)
Supplement: s1 [file s1]

Archive with 1 entries (1 files):
- cancers-2090639-supplementary.pdf
