# Supplementary material for: Deciphering the Molecular Mechanism of Spontaneous Senescence in Primary Epithelial Ovarian Cancer Cells
Source: MDPI journal article supplement (doi:10.3390/cancers12020296), 2020-01-27

Supplementary Materials: The whole immunoblotting membranes.

Uncropped Western Blot Figures for Figure 3 d:

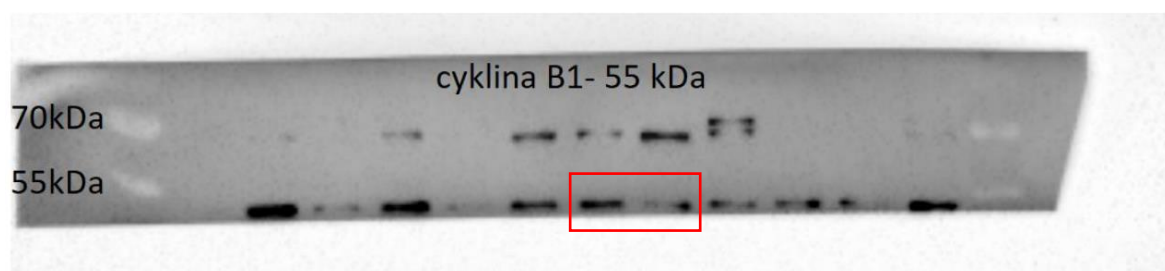

**Cyclin D1**

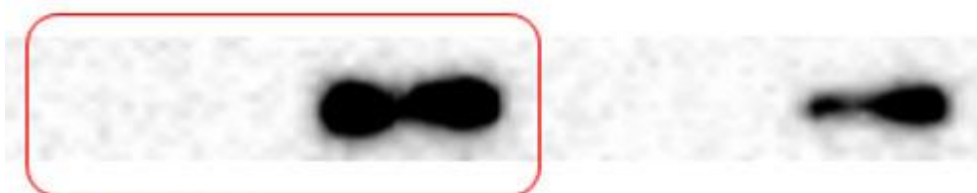

**Cyclin D2**

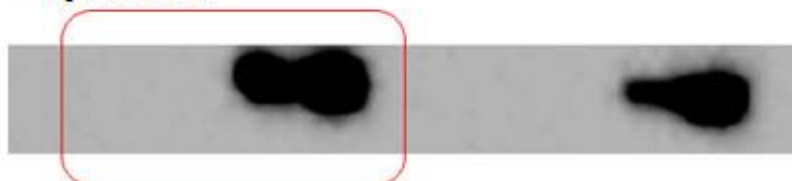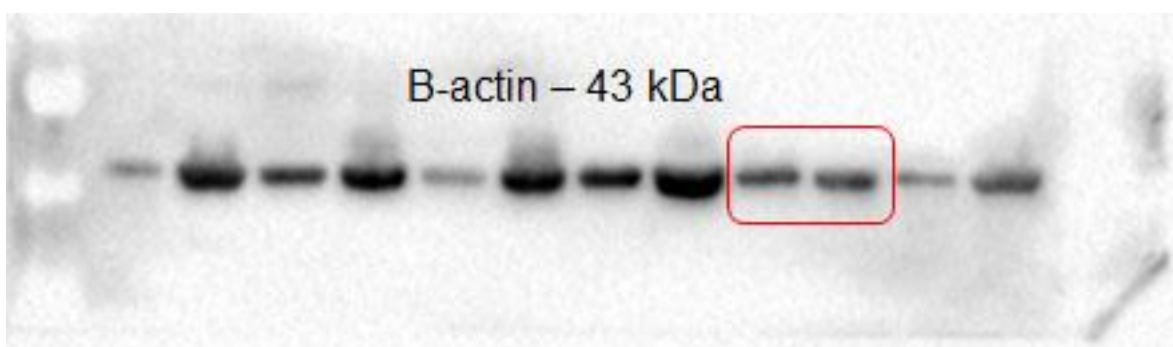

Uncropped Western Blot Figures for Figure 5a:

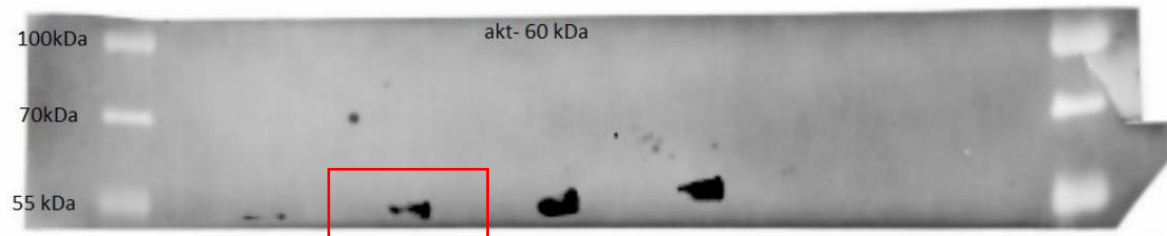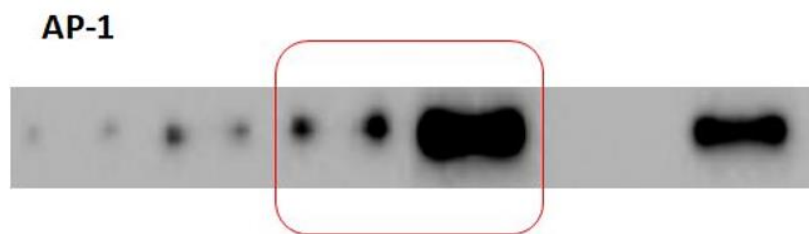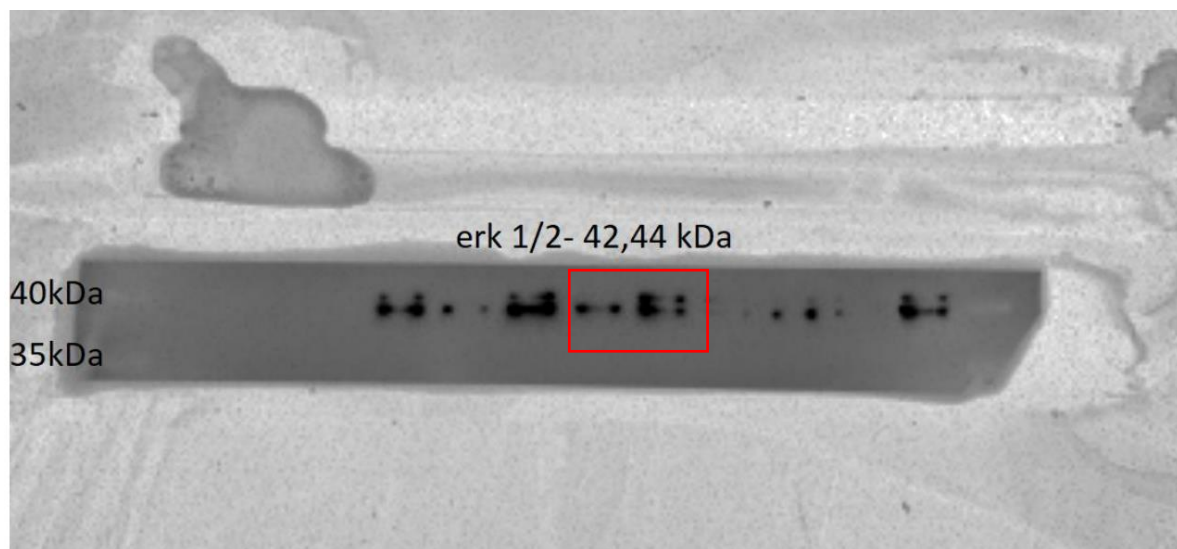

FOXO 4

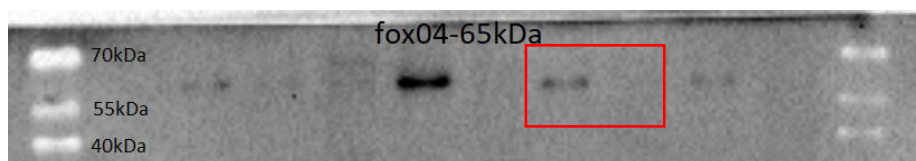

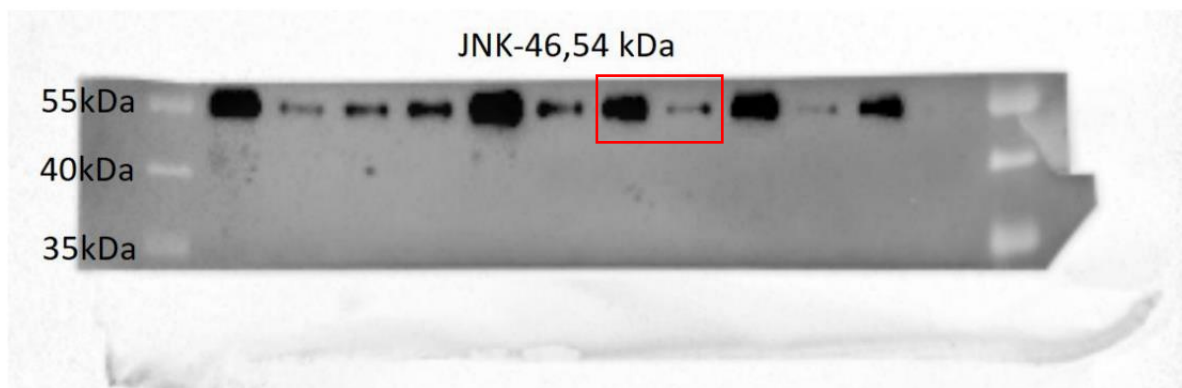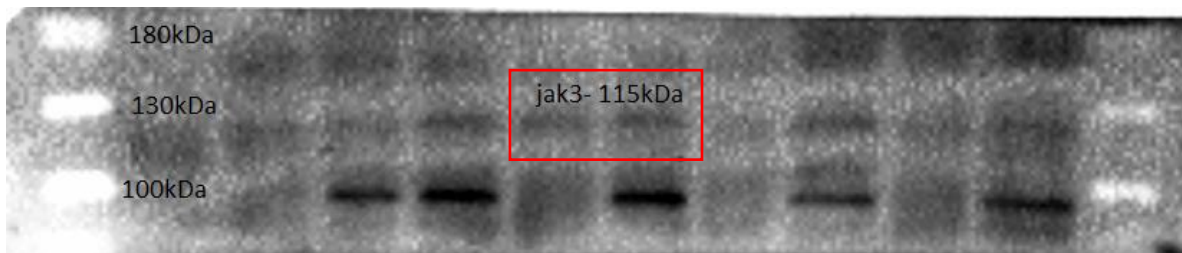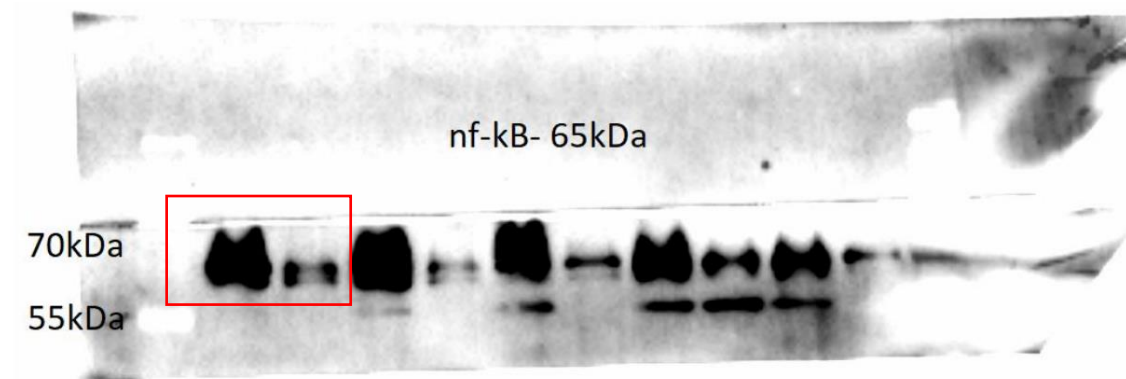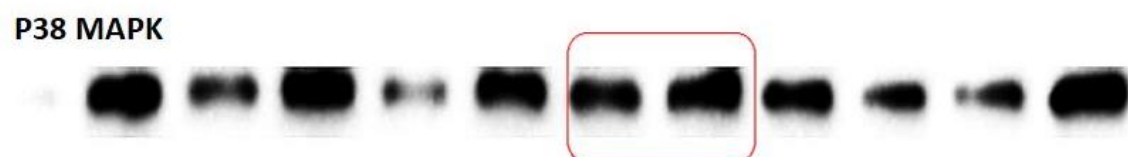

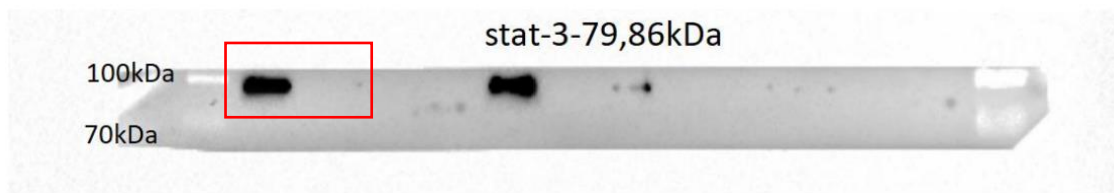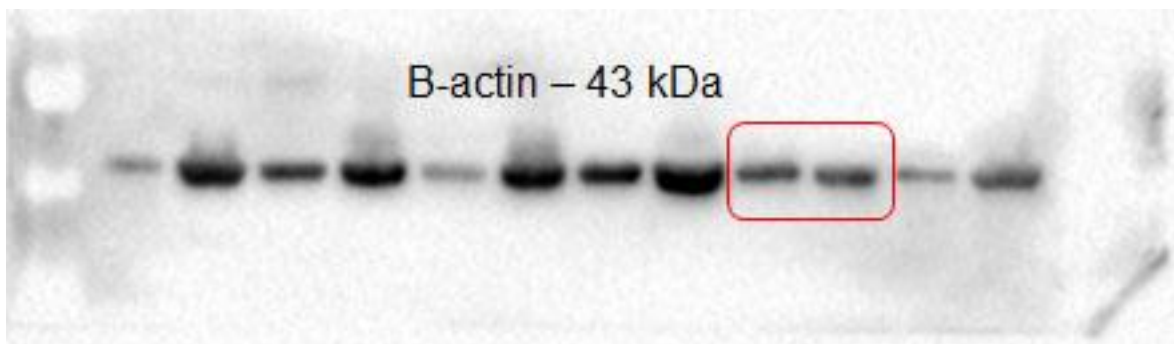

Supplement: s1 [file s1 › cancers-2090639-supplementary.pdf]
